# Supplementary material for: Morphology engineering of atomic layer defect-rich CoSe2 nanosheets for highly selective electrosynthesis of hydrogen peroxide
Source: Royal Society of Chemistry journal article supplement (doi:10.1039/d1ta05731f), 2021-01-01
Supplement: d1ta05731f1.pdf [file d1ta05731f1.pdf]

## Supporting Information

### **Morphology engineering of Atomic Layer Defect-Rich CoSe<sub>2</sub> Nanosheets for Highly Selective Electrosynthesis of Hydrogen Peroxide**

Yuan Ji,<sup>a</sup> Yundan Liu,<sup>a\*</sup> Bin-Wei Zhang,<sup>b\*</sup> Zhongfei Xu,<sup>c</sup> Xiang Qi,<sup>a</sup> Xun Xu,<sup>b</sup> Long Ren,<sup>e\*</sup> Yi Du,<sup>b,d</sup> Jianxin Zhong<sup>a</sup> and Shi Xue Dou<sup>b,d</sup>

<sup>a</sup> *Hunan Key Laboratory of Micro-Nano Energy Materials and Devices, Laboratory for Quantum Engineering and Micro-Nano Energy Technology, and Faculty of Materials and Optoelectronic Physics, Xiangtan University, Hunan 411105, P. R. China*

<sup>b</sup> *Institute for Superconducting and Electronic Materials (ISEM), University of Wollongong, Wollongong, NSW 2500, Australia*

<sup>c</sup> *Beijing Computational Science Research Center, Beijing, 100091, China*

<sup>d</sup> *BUAA-UOW Joint Research Centre, and School of Physics, Beihang University, Beijing, 100091, China*

<sup>e</sup> *State Key Laboratory of Advanced Technology for Materials Synthesis and Processing, and International School of Materials Science and Engineering, Wuhan University of Technology, Wuhan 430070, China*

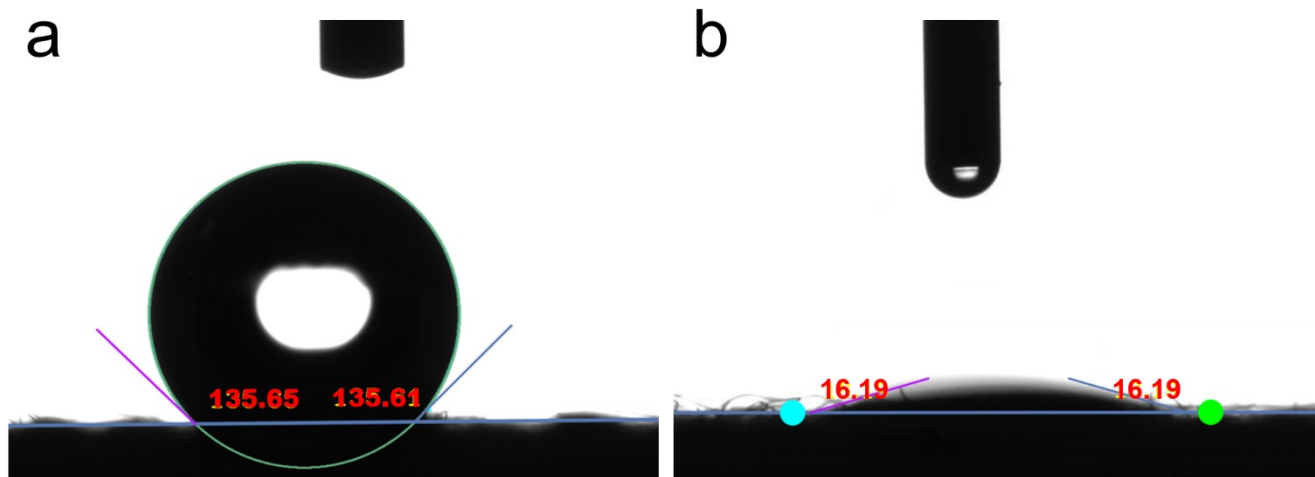

**Figure S1.** The water contact angles of (a) hydrophobic carbon cloth and (b) hydrophilic carbon cloth.

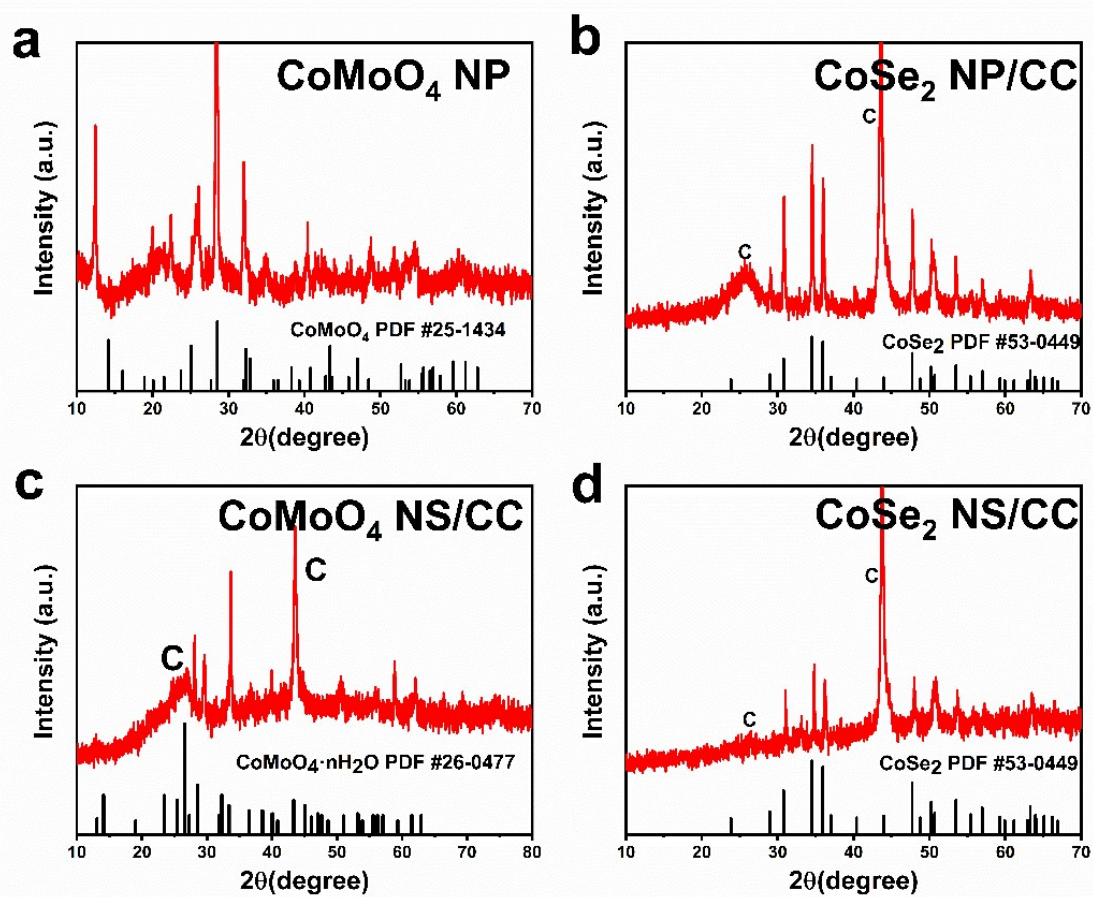

**Figure S2.** XRD patterns of (a) CoMoO<sub>4</sub> NP; (b) CoSe<sub>2</sub> NP/CC; (c) CoMoO<sub>4</sub> NS/CC; (d) CoSe<sub>2</sub> NS/CC.

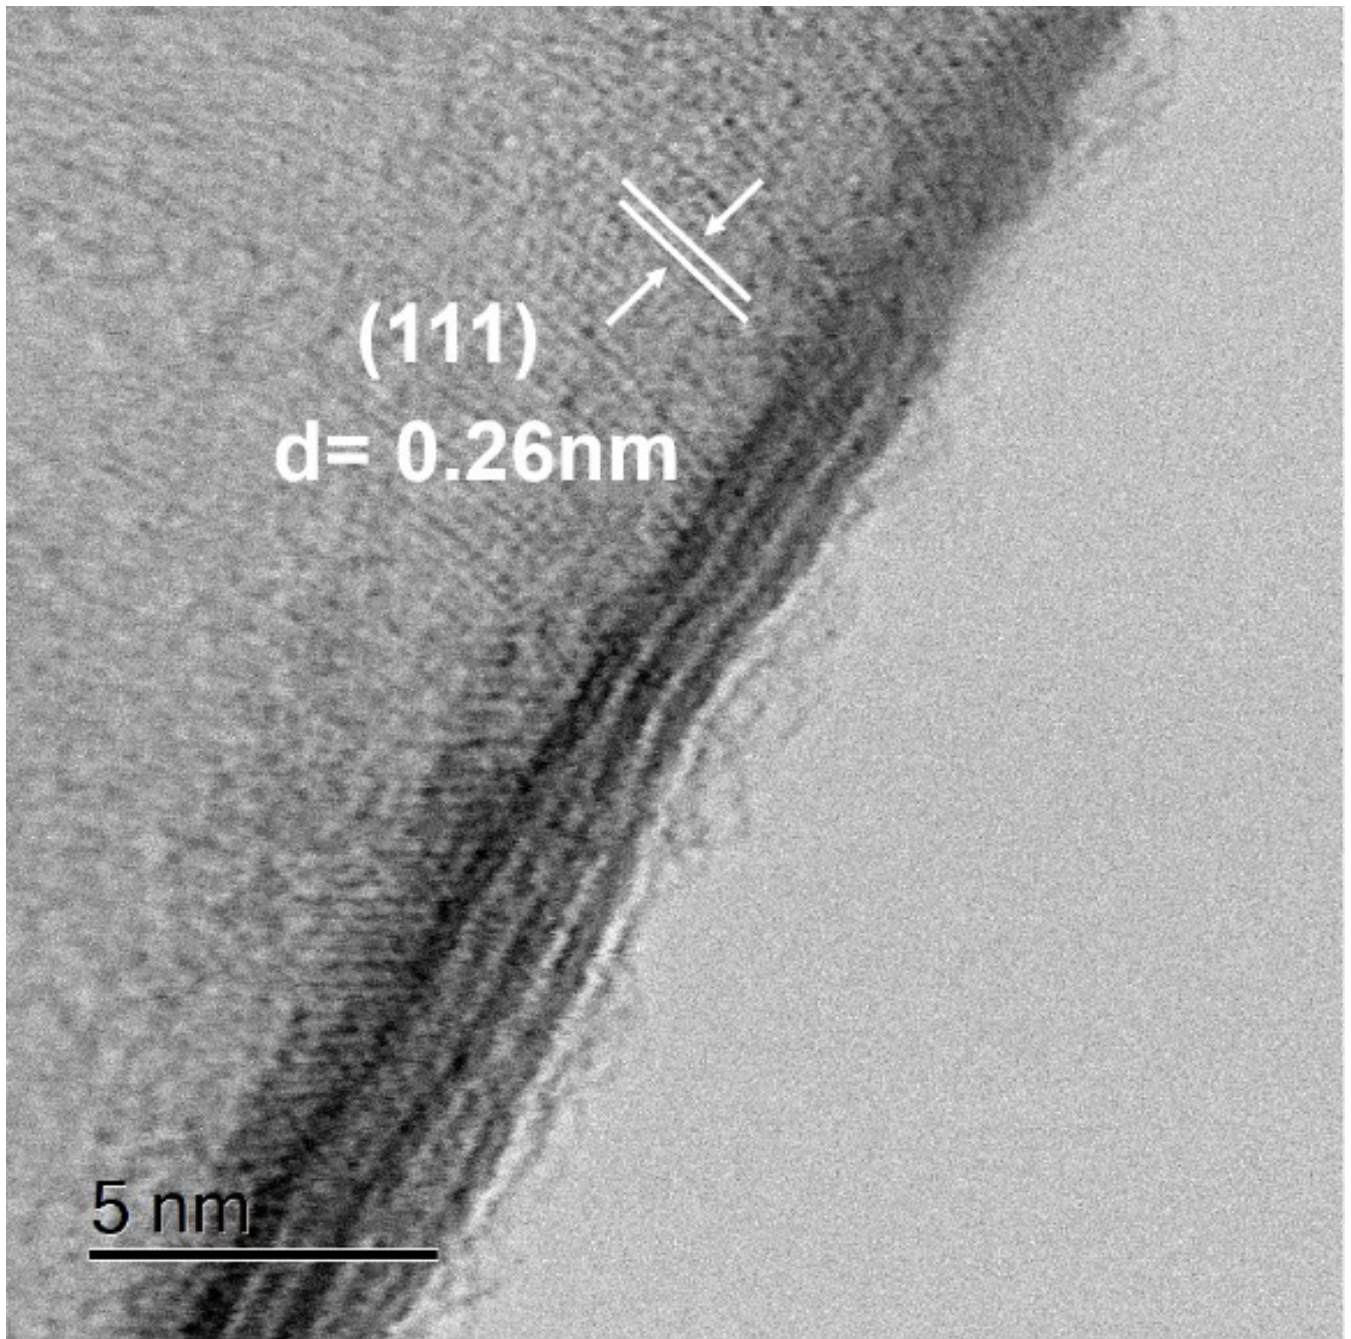

**Figure S3.** High-resolution TEM images of CoSe<sub>2</sub> NS/CC

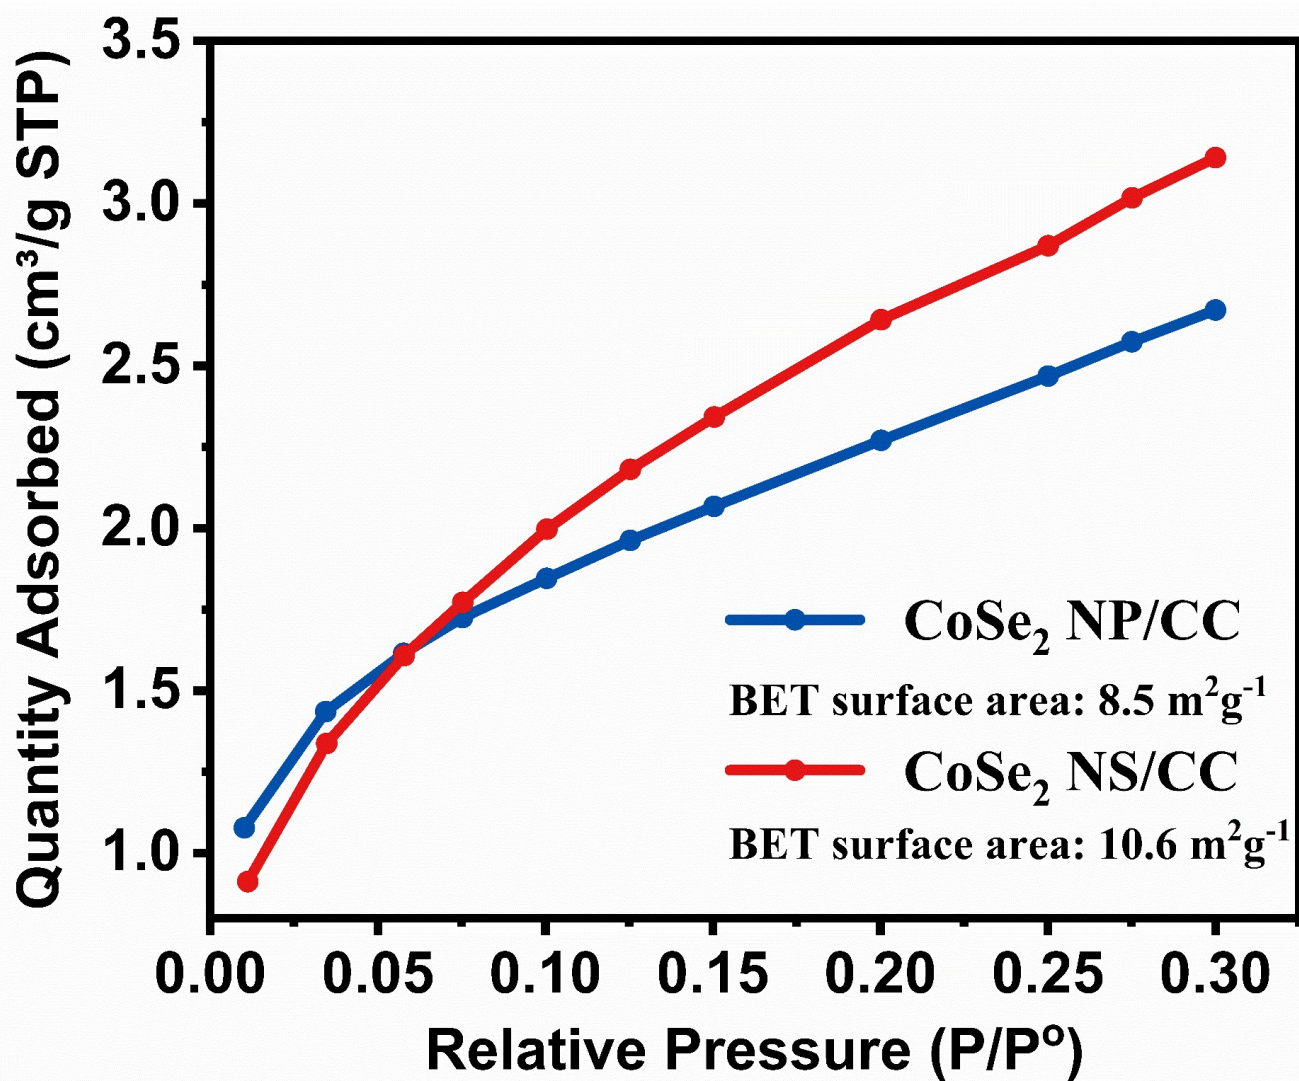

Figure S4. Nitrogen adsorption isotherms of CoSe<sub>2</sub> NS/CC and CoSe<sub>2</sub> NP/CC at 77K.

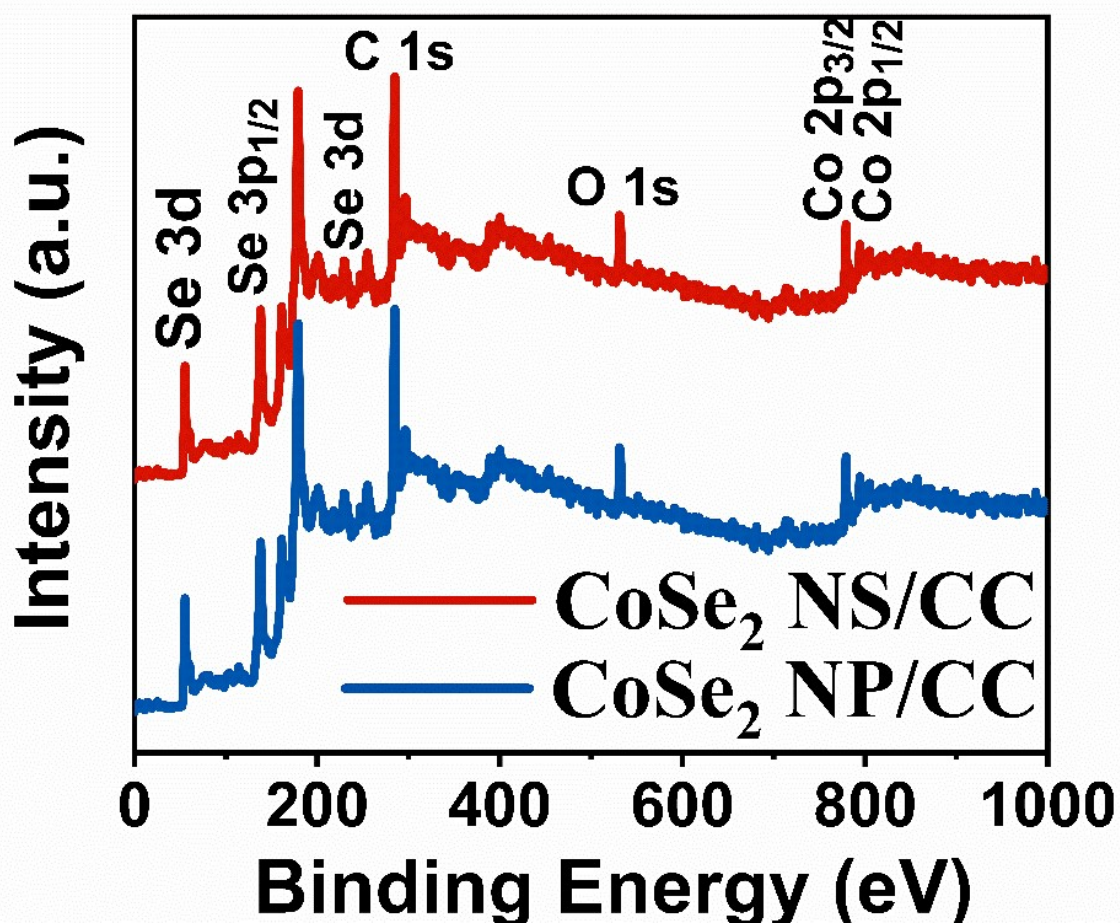

Figure S5. XPS survey spectrum of CoSe<sub>2</sub> NS/CC and CoSe<sub>2</sub> NP/CC.

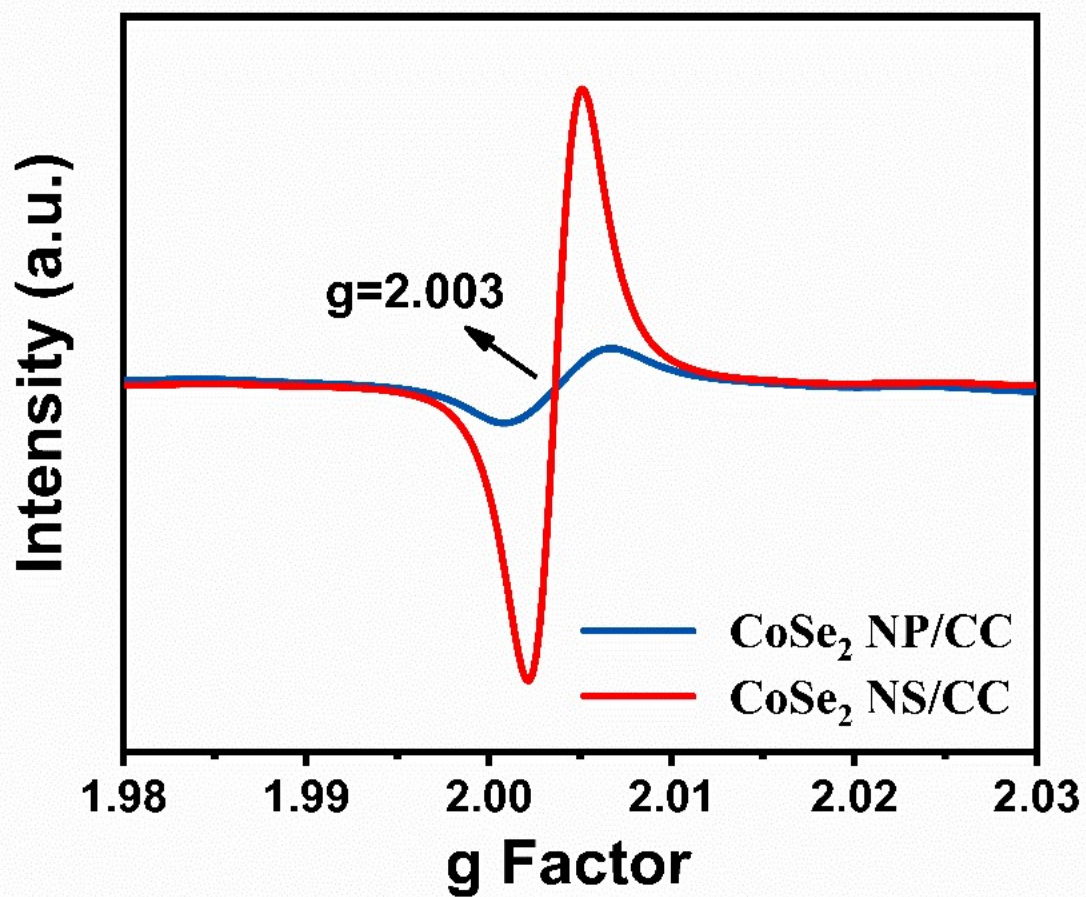

**Figure S6.** The EPR spectra of CoSe<sub>2</sub> NS/CC and CoSe<sub>2</sub> NP/CC.

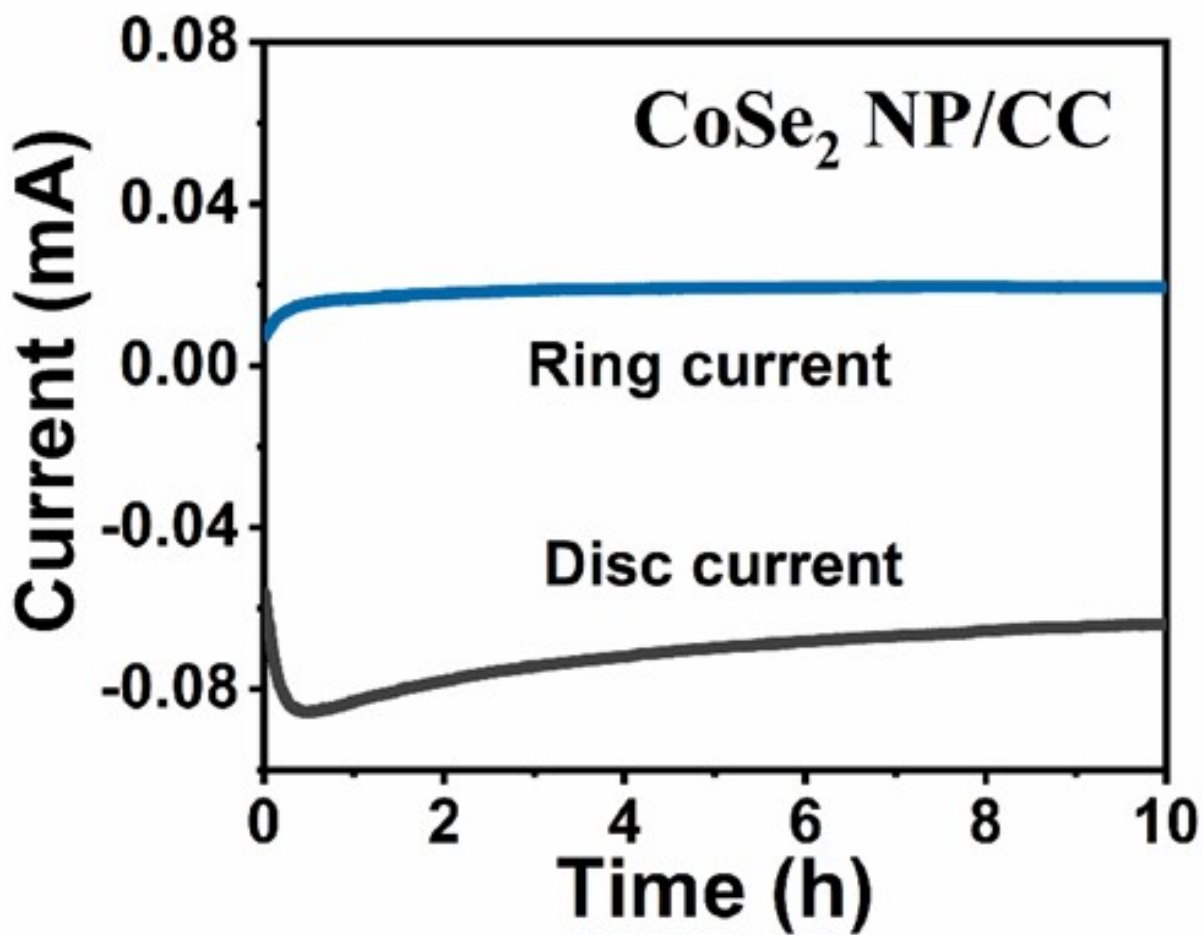

Figure S7. Stability measurements of CoSe<sub>2</sub> NP/CC at 0.1 M KOH.



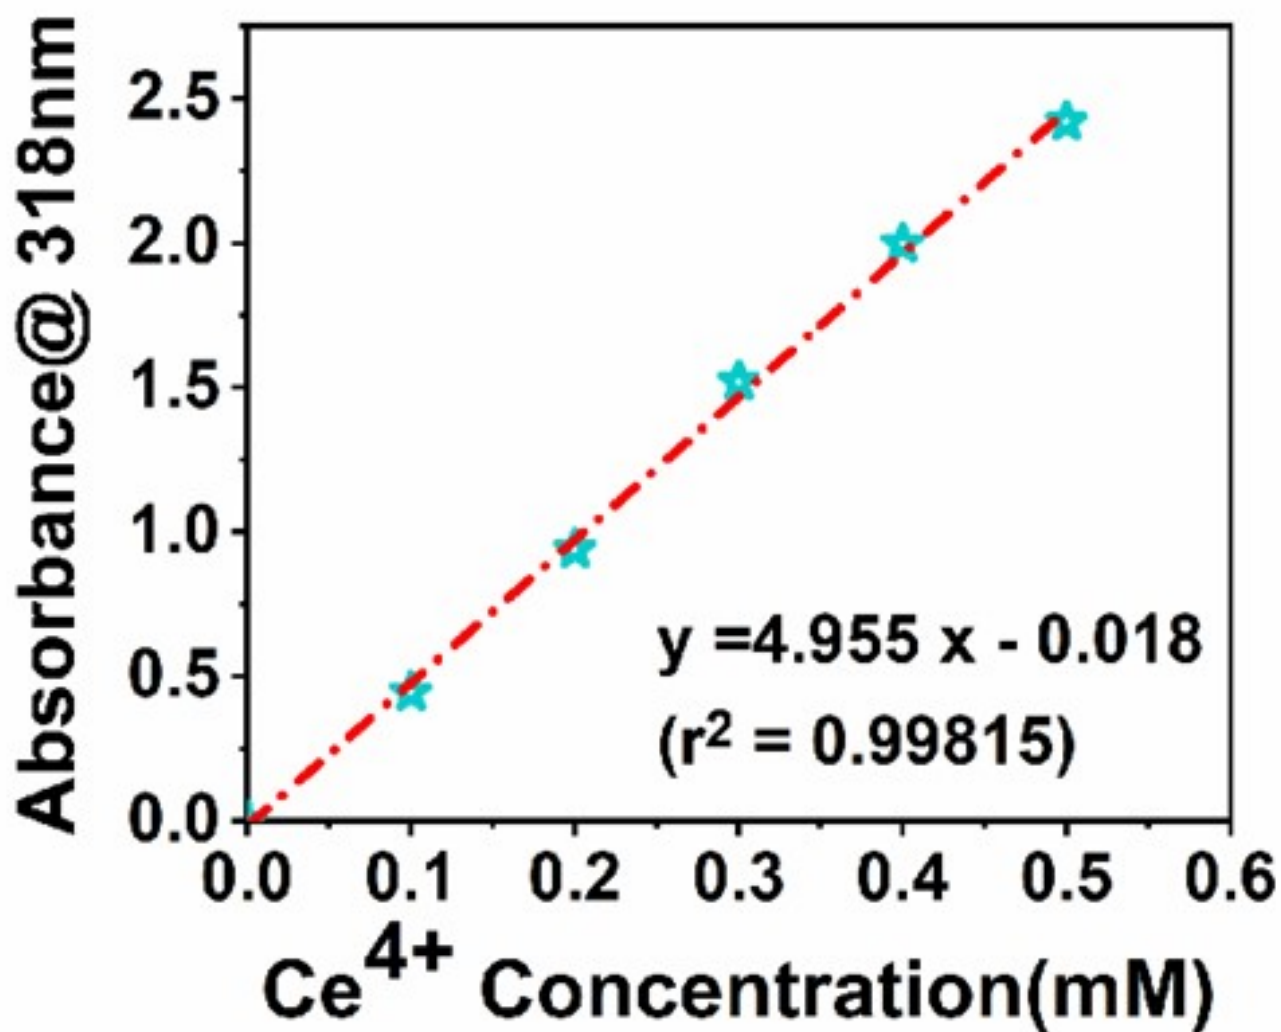

**Figure S8.** Linear calibration curve for UV-Visible spectra of the different concentrations of the cerium titration solution (up to 0.5 mM).

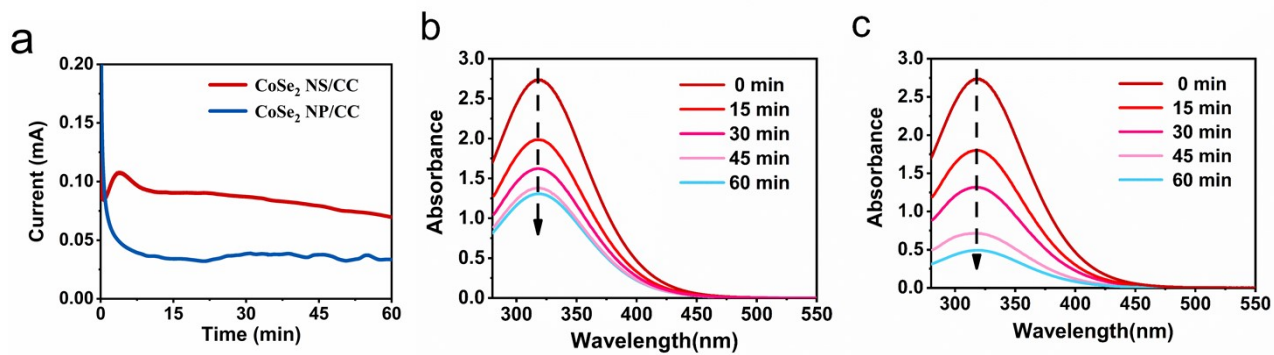

**Figure S9.** (a)  $I-t$  profile of CoSe<sub>2</sub> NS/CC and CoSe<sub>2</sub> NP/CC under a constant voltage of 0.76 V for practical H<sub>2</sub>O<sub>2</sub> electrosynthesis in 0.1 M KOH solution. UV-Visible spectra indicating the generated H<sub>2</sub>O<sub>2</sub> concentration every 15 min under 0.1 M KOH: (b) CoSe<sub>2</sub> NP/CC and (c) CoSe<sub>2</sub> NS/CC.

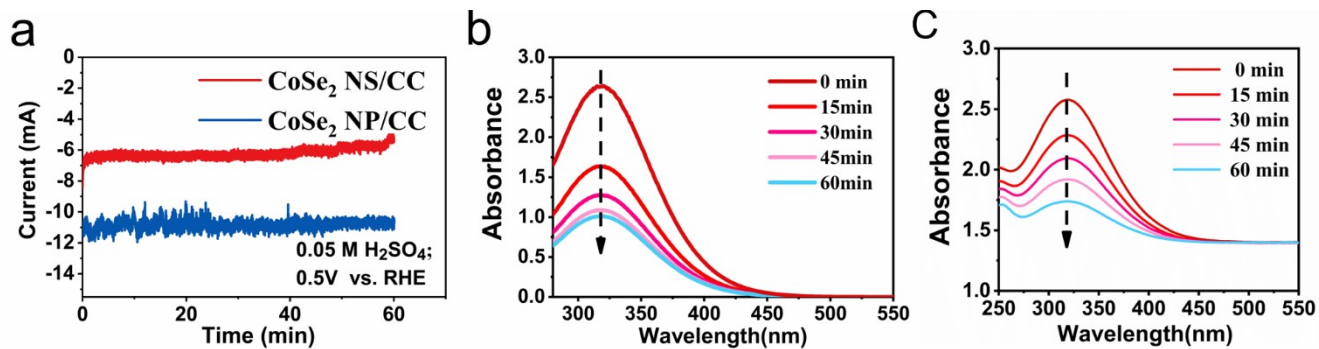

**Figure S10.** (a)  $I-t$  profile of CoSe<sub>2</sub> NS/CC and CoSe<sub>2</sub> NP/CC under a constant voltage of 0.5 V for practical H<sub>2</sub>O<sub>2</sub> electrosynthesis in 0.05 M H<sub>2</sub>SO<sub>4</sub> solution. UV/Visible spectra indicating the generated H<sub>2</sub>O<sub>2</sub> concentration every 15 min under 0.05 M H<sub>2</sub>SO<sub>4</sub>: (b) CoSe<sub>2</sub> NS/CC and (c) CoSe<sub>2</sub> NP/CC.

**Table S1.** Activity and selectivity comparison of the CoSe<sub>2</sub> NS/CC catalyst with Co-based catalysts and precious metals for electrochemical oxygen reduction to H<sub>2</sub>O<sub>2</sub>.

| Catalyst                      | Electrolyte (Volume)                 | Onset Potential | Selectivity | Time       | Reference        |
|-------------------------------|--------------------------------------|-----------------|-------------|------------|------------------|
| <b>CoSe<sub>2</sub> NS/CC</b> | <b>0.1M KOH</b>                      | <b>0.72V</b>    | <b>92%</b>  | <b>10h</b> | <b>This work</b> |
| CoSe <sub>2</sub> NP/CC       | 0.1MKOH                              | 0.71V           | 72%         | 10h        | This work        |
| Co <sub>1</sub> -NG(O)        | 0.1 M KOH                            | 0.75V           | 80%         | 110h       | 1                |
| Co-POC-O                      | 0.1M KOH                             | 0.78V           | 84%         | 10h        | 2                |
| Co-N-C                        | 0.5M H <sub>2</sub> SO <sub>4</sub>  | 0.65V           | ~80%        | 6h         | 3                |
| Co-NC                         | 0.1M HClO <sub>4</sub>               | 0.65V           | >90%        | 10h        | 4                |
| o-CoSe <sub>2</sub> /CFP      | 0.05M H <sub>2</sub> SO <sub>4</sub> | ~0.7V           | 83%         | 6h         | 5                |
| CoS <sub>2</sub> nanowires    | 0.05M H <sub>2</sub> SO <sub>4</sub> | 0.69V           | 70%         | 1h         | 6                |
| Au-Pt-Ni                      | 0.1 M KOH                            | 0.65 V          | ~95%        | 10h        | 7                |

**Table S2.** H<sub>2</sub>O<sub>2</sub> production rate comparison of various catalysts in alkaline solution.

| Catalysts                     | Voltage     | Production Rate (mg L <sup>-1</sup> h <sup>-1</sup> ) | Reference        |
|-------------------------------|-------------|-------------------------------------------------------|------------------|
| <b>CoSe<sub>2</sub> NS/CC</b> | <b>0.76</b> | <b>1227</b>                                           | <b>This work</b> |
| CoSe <sub>2</sub> NP/CC       | 0.76        | 782                                                   | This work        |
| Co-POC-O                      | 1.5         | 813                                                   | 2                |
| Ni-LDH C/CNSs                 | 1.2         | 356.3                                                 | 8                |
| Fe-CNT                        | 0.38        | 461                                                   | 9                |
| Co <sub>1</sub> -NG(O)        | 0.58        | 242                                                   | 1                |
| aCB                           | 0.8         | 20                                                    | 10               |
| Au-Pt-Ni                      | 0.5         | 2.22                                                  | 7                |

**Table S3.** H<sub>2</sub>O<sub>2</sub> production rate comparison of various catalysts in acidic solution.

| Catalysts                     | Voltage    | Production Rate (mg L <sup>-1</sup> h <sup>-1</sup> ) | Reference        |
|-------------------------------|------------|-------------------------------------------------------|------------------|
| <b>CoSe<sub>2</sub> NS/CC</b> | <b>0.5</b> | <b>894</b>                                            | <b>This work</b> |
| CoSe <sub>2</sub> NP/CC       | 0.5        | 454                                                   | This work        |
| CoS <sub>2</sub>              | 0.5        | 148.3                                                 | 6                |
| O-CoSe <sub>2</sub>           | 0.5        | 90                                                    | 5                |
| HE-CoN/CNTs                   | 1.2        | 748                                                   | 11               |
| g-N-CNH                       | 0.38       | 1                                                     | 12               |
| RF-AQNC                       | 0.1        | 432                                                   | 13               |
| Pt/HSC                        | 0          | 2.65                                                  | 14               |

## References

1. E. Jung, H. Shin, B. H. Lee, V. Efremov, S. Lee, H. S. Lee, J. Kim, W. Hooch Antink, S. Park, K. S. Lee, S. P. Cho, J. S. Yoo, Y. E. Sung and T. Hyeon, *Nat. Mater.*, 2020, 19, 436-442.
2. B. Q. Li, C. X. Zhao, J. N. Liu and Q. Zhang, *Adv. Mater.*, 2019, 31, e1808173.
3. Y. Sun, L. Silvioli, N. R. Sahraie, W. Ju, J. Li, A. Zitolo, S. Li, A. Bagger, L. Arnarson, X. Wang, T. Moeller, D. Bernsmeier, J. Rossmeisl, F. Jaouen and P. Strasser, *J. Am. Chem. Soc.*, 2019, 141, 12372-12381.
4. J. Gao, H. b. Yang, X. Huang, S.-F. Hung, W. Cai, C. Jia, S. Miao, H. M. Chen, X. Yang, Y. Huang, T. Zhang and B. Liu, *Chem*, 2020, 6, 658-674.
5. H. Y. Sheng, A. N. Janes, R. D. Ross, D. Kaiman, J. Z. Huang, B. Song, J. R. Schmidt and S. Jin, *Energy Environ. Sci.*, 2020, 13, 4189-4203.
6. H. Sheng, E. D. Hermes, X. Yang, D. Ying, A. N. Janes, W. Li, J. R. Schmidt and S. Jin, *ACS Catalysis*, 2019, 9, 8433-8442.
7. Z. Zheng, Y. H. Ng, D.-W. Wang and R. Amal, *Adv. Mater.*, 2016, 28, 9949-9955.
8. J. Huang, J. Chen, C. Fu, P. Cai, Y. Li, L. Cao, W. Liu, P. Yu, S. Wei, Z. Wen and J. Li, *ChemSusChem*, 2020, 13, 1496-1503.
9. K. Jiang, S. Back, A. J. Akey, C. Xia, Y. Hu, W. Liang, D. Schaak, E. Stavitski, J. K. Norskov, S. Siahrostami and H. Wang, *Nat. Commun.*, 2019, 10, 3997.
10. W. Wang, Y. Hu, Y. Liu, Z. Zheng and S. Chen, *ACS Appl. Mater. Interfaces*, 2018, 10, 31855-31859.
11. Q. Zhang, X. Tan, N. M. Bedford, Z. Han, L. Thomsen, S. Smith, R. Amal and X. Lu, *Nat. Commun.*, 2020, 11, 4181.
12. D. Iglesias, A. Giuliani, M. Melchionna, S. Marchesan, A. Criado, L. Nasi, M. Bevilacqua, C. Tavagnacco, F. Vizza, M. Prato and P. Fornasiero, *Chem*, 2018, 4, 106-123.
13. A. Wang, A. Bonakdarpour, D. P. Wilkinson and E. Gyenge, *Electrochim. Acta*, 2012, 66, 222-229.
14. C. H. Choi, M. Kim, H. C. Kwon, S. J. Cho, S. Yun, H. T. Kim, K. J. Mayrhofer, H. Kim and M. Choi, *Nat. Commun.*, 2016, 7, 10922.
